# Supplementary material for: AMIDE v2: High-Throughput Screening Based on AutoDock-GPU and Improved Workflow Leading to Better Performance and Reliability
Source: MDPI journal article supplement (doi:10.3390/ijms22147489), 2021-07-13
Supplement: s1 [file s1]

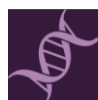

## Supplementary data

**Table S1 :** *Toxoplasma gondii* protein dataset

| Protein                                                    | PDB  | Uniprot    | Resolution (Å) | Global Stoichiometry | Chain(s)              |
|------------------------------------------------------------|------|------------|----------------|----------------------|-----------------------|
| ACYL CARRIER PROTEIN                                       | 2QNW | O77470     | 1.90           | Monomer              | A                     |
| ADENOSINE KINASE + ADenosiNe                               | 1DGM | Q9TVW2     | 1.80           | Monomer              | A                     |
| ADENOSINE KINASE FROM 1DGM                                 | 1DGM | Q9TVW2     | 1.80           | Monomer              | A                     |
| APICAL COMPLEX LYSINE METHYLTRANSFERASE                    | 6FND | B9Q0K5     | 2.10           | Homo 2-mer           | B / C                 |
| APICAL MEMBRANE ANTIGEN AMA1                               | 4YIV | S8GKS3     | 1.93           | Monomer              | A                     |
| BIFUNCTIONAL DIHYDROFOLATE REDUCTASE-THYMIDYLATE SYNTHASE  | 6AOI | Q07422     | 2.97           | Monomer              | A                     |
| BRADYZOITE PSEUDOKINASE 1                                  | 6M7Z | A0A452CSY6 | 2.50           | Monomer              | A                     |
| BRADYZOITE SURFACE ANTIGEN BSR4                            | 2JKS | Q95NL6     | 1.90           | Homo 3-mer           |                       |
| CALCIUM-DEPENDENT PROTEIN KINASE 3                         | 3HZT | Q3HNM6     | 2.00           | Homo 4-mer           | A / B / C / D         |
| CALMODULIN-DOMAIN PROTEIN KINASE 1                         | 6BFA | A0A0F7UUA6 | 2.80           | Monomer              | B                     |
| CALMODULIN-DOMAIN PROTEIN KINASE 1                         | 3I79 | Q9BJF5     | 2.04           | Monomer              | A                     |
| CALMODULIN-DOMAIN PROTEIN KINASE 1 IN-ACTIVATED FORM + ANP | 3KU2 | Q9BJF5     | 2.30           | Monomer              | A                     |
| CATHEPSIN L PROTEASE                                       | 3F75 | Q6DMN0     | 1.99           | Homo 2-mer           | A / B                 |
| CYCLOPHILIN                                                | 3BKP | D0VWS4     | 1.80           | Monomer              | A                     |
| DEOXYRIBOSE-PHOSPHATE ALDOLASE                             | 4EIV | B9PVB4     | 1.37           | Monomer              | A                     |
| DJ-1 FAMILY PROTEIN                                        | 4XLL | B9PZH8     | 2.08           | Homo 2-mer           | A / B                 |
| DOUBLECORTIN                                               | 6B4A | B6KAS6     | 2.00           | Homo 4-mer           | A / B / C / D         |
| EGF FAMILY DOMAIN-CONTAINING PROTEIN                       | 4Z81 | S7UIL3     | 2.05           | Homo 2-mer           | A / B                 |
| ENOLASE                                                    | 3OTR | B9PH47     | 2.75           | Homo 2-mer           | A / B                 |
| ENOYL-ACYL CARRIER REDUCTASE                               | 2O50 | Q6UCJ9     | 2.90           | Homo 2-mer           | A / B                 |
| ENOYL-ACYL CARRIER REDUCTASE                               | 3NJ8 | Q6UCJ9     | 2.70           | Homo 6-mer           | A / B / C / E / F / G |
| ENOYL-ACYL CARRIER REDUCTASE                               | 4O1M | Q6UCJ9     | 2.00           | Monomer              | A                     |
| ENOYL-ACYL CARRIER REDUCTASE + NAD                         | 2O2S | Q6UCJ9     | 2.60           | Hetero 2-mer         | B                     |
| FRUCTOSE-1 /6-BISPHOSPHATE ALDOLASE                        | 4TU1 | B9PW35     | 2.00           | Monomer              | A                     |
| FRUCTOSE-BISPHOSPHATE ALDOLASE                             | 5TJS | Q8I8I2     | 1.78           | Monomer              | A                     |
| FRUCTOSE-BISPHOSPHATE ALDOLASE + SCHIFF                    | 5TKP | Q8I8I2     | 2.09           | Hetero 2-mer         | A                     |
| GLUCOSE-6-PHOSPHATE ISOMERASE                              | 3UJH | NA         | 2.10           | Hetero 2-mer         | A                     |
| GLUTAMINE AMINOACYL-TRNA SYNTHETASE                        | 4P2B | B6KTZ0     | 2.80           | Monomer              | A                     |
| GLYCERALDEHYDE-3-PHOSPHATE DEHYDROGENASE + NAD             | 3STH | Q9BKE2     | 2.25           | Homo 2-mer           | A / B                 |

|                                                       |      |            |      |            |               |
|-------------------------------------------------------|------|------------|------|------------|---------------|
| GLYCERALDEHYDE-3-PHOSPHATE DEHYDROGENASE FROM 3STH    | 3STH | Q9BKE2     | 2.25 | Homo 2-mer | A / B         |
| HYPOXANTHINE-GUANINE PHOSPHORIBOSYL-TRANSFERASE       | 1FSG | Q26997     | 1.05 | Homo 2-mer | A / C         |
| HYPOXANTHINE-GUANINE PHOSPHORIBOSYL-TRANSFERASE + GMP | 1QK3 | Q26997     | 1.65 | Monomer    | E             |
| HYPOXANTHINE-GUANINE PHOSPHORIBOSYL-TRANSFERASE + IMP | 1QK4 | Q26997     | 1.90 | Monomer    | A             |
| HYPOXANTHINE-GUANINE PHOSPHORIBOSYL-TRANSFERASE + XMP | 1QK5 | Q26997     | 1.60 | Monomer    | A             |
| IMC SUB-COMPARTMENT PROTEIN ISP1                      | 4CHM | B9PKK4     | 2.10 | Monomer    | A             |
| IMC SUB-COMPARTMENT PROTEIN ISP3                      | 4CHJ | B9PJE6     | 2.32 | Monomer    | A             |
| INFLAMMATORY PROFILIN                                 | 3NEC | Q58NA1     | 1.70 | Homo 2-mer | A / B         |
| LACTATE DEHYDROGENASE APO                             | 1PZE | P90613     | 1.95 | Homo 4-mer |               |
| LACTATE DEHYDROGENASE WITH APAD                       | 1PZG | P90613     | 1.60 | Homo 4-mer | A / B / C / D |
| LACTATE DEHYDROGENASE WITH NAD                        | 1PZH | P90613     | 1.90 | Homo 4-mer | A / B / C / D |
| L-LACTATE DEHYDROGENASE + NAD                         | 1SOW | Q27797     | 1.90 | Monomer    | A             |
| L-LACTATE DEHYDROGENASE APO                           | 1SOV | Q27797     | 1.90 | Homo 2-mer | A / B         |
| MAJOR SURFACE ANTIGEN P30                             | 1KZQ | P13664     | 1.70 | Homo 2-mer | A / B         |
| MICRONEMAL PROTEIN 1                                  | 2JH1 | O00834     | 1.90 | Homo 4-mer |               |
| MICRONEMAL PROTEIN MIC2                               | 4OKR | O00816     | 2.60 | Homo 4-mer | A / B / C / D |
| MICRONEME PROTEIN 2                                   | 2XGG | NA         | 2.05 | Homo 4-mer | A / B / C / D |
| MIF                                                   | 4DH4 | A1XDS9     | 1.82 | Homo 4-mer |               |
| MITOCHONDRIAL ASSOCIATION FACTOR 1                    | 6BXR | A0A140H546 | 1.60 | Homo 4-mer | A / B / C / D |
| MITOCHONDRIAL ASSOCIATION FACTOR 1 + APR              | 6BXW | A0A140H546 | 1.65 | Homo 4-mer | A / B / C / D |
| MITOGEN-ACTIVATED PROTEIN KINASE                      | 3RP9 | B6KP12     | 2.40 | Monomer    | B             |
| MYOSIN A                                              | 6DUE | S7W634     | 2.60 | Homo 4-mer |               |
| MYOSIN A FROM 6DUE                                    | 6DUE | S7W634     | 2.60 | Homo 4-mer |               |
| MYOSIN LIGHT CHAIN TGMLC1                             | 5VT9 | Q95UJ7     | 1.85 | Homo 4-mer | A / B / C / D |
| NUCLEOSIDE DIPHOSPHATE KINASE                         | 5BXI | B9Q287     | 1.70 | Homo 4-mer | A / B / C / D |
| NUCLEOSIDE-TRIPHOSPHATASE 1                           | 4A57 | Q27893     | 2.00 | Homo 2-mer | A / B         |
| NUCLEOSIDE-TRIPHOSPHATASE 1 + AMP                     | 4A59 | Q27893     | 2.20 | Homo 6-mer |               |
| NUCLEOSIDE-TRIPHOSPHATASE 2                           | 4A5B | Q27895     | 2.48 | Monomer    | A             |
| ORNITHINE AMINOTRANSFERASE / MITOCHONDRIAL / PUTATIVE | 5EAV | S8EY38     | 1.60 | Homo 4-mer |               |
| OROTIDINE 5'-PHOSPHATE DECARBOXYLASE                  | 4MJZ | Q12339     | 2.75 | Monomer    | A             |

|                                                      |      |            |      |              |               |
|------------------------------------------------------|------|------------|------|--------------|---------------|
| PEPTIDYL-PROLYL CIS-TRANS ISOMERASE CYCLOPHILIN-TYPE | 3BO7 | D0VWS5     | 2.35 | Homo 2-mer   | A / B         |
| PERFORIN-LIKE PROTEIN 1                              | 6D7A | A1E348     | 1.13 | Monomer      | B             |
| PERFORIN-LIKE PROTEIN 1                              | 5OUP | V5BCL0     | 2.03 | Hetero 2-mer | A / P         |
| PHOSPHOGLYCERATE MUTASE PGMII                        | 4ODI | S8GJT7     | 2.60 | Homo 4-mer   |               |
| PROLYL-TRNA SYNTHETASE (PRORS)                       | 5XIF | S8G8I1     | 2.48 | Homo 4-mer   |               |
| PROTEIN KINASE A                                     | 5J3U | A0A0F7V8B2 | 1.80 | Homo 4-mer   |               |
| PROTEIN KINASE A + AMPc                              | 5J3U | A0A0F7V8B2 | 1.80 | Homo 4-mer   | A / B / C / E |
| PROTEIN PHOSPHATASE 2C                               | 3D8K | A4GX63     | 2.71 | Homo 4-mer   |               |
| PTERIN-4A-CARBINOLAMINE DEHYDRATASE                  | 2V6U | Q2Q449     | 1.6  | Homo 4-mer   |               |
| PURINE NUCLEOSIDE PHOSPHORYLASE                      | 3MB8 | Q2HXR2     | 1.90 | Monomer      | A             |
| PYRUVATE KINASE                                      | 3EOE | Q969A2     | 2.31 | Monomer      | A             |
| RHOPTRY KINASE 2 + 8                                 | 3BYV | O15693     | 1.80 | Hetero 2-mer | B / D         |
| RHOPTRY KINASE DOMAIN                                | 3DZO | Q06AK3     | 1.80 | Homo 4-mer   | A / B / C / D |
| RHOPTRY KINASE FAMILY PROTEIN                        | 4JRN | Q2PAY2     | 2.71 | Monomer      | A             |
| RHOPTRY PROTEIN 5 C + GDP + ADP                      | 4LV8 | I6ZQR7     | 1.72 | Monomer      | A             |
| RHOPTRY PROTEIN 5 C FROM PDB 4LV8                    | 4LV8 | I6ZQR7     | 1.72 | Homo 2-mer   | A / D         |
| RIBULOSE 5-PHOSPHATE ISOMERASE                       | 4NML | S8GQK2     | 2.60 | Homo 2-mer   | A / D         |
| RIBULOSE-PHOSPHATE 3-EPIMERASE                       | 4NU7 | NA         | 2.05 | Monomer      | A             |
| ROP2                                                 | 2W1Z | Q27007     | 1.97 | Monomer      | A             |
| ROP5B                                                | 3Q5Z | F2YGR7     | 1.90 | Monomer      | A             |
| ROP5B + ATP                                          | 3Q60 | F2YGR7     | 1.72 | Monomer      | A             |
| SEDOHEPTULOSE-1 / 7 BISPHOSPHATASE / PUTATIVE        | 4IR8 | B9PW60     | 1.85 | Monomer      | A             |
| SERINE-THREONINE PHOSPHATASE 2C                      | 2I44 | Q8WPN9     | 2.04 | Homo 2-mer   | A / B         |
| SOLUBLE INORGANIC PYROPHOSPHATASE                    | 5WRT | Q4VUZ3     | 2.35 | Homo 2-mer   | A / B         |
| TRIOSEPHOSPHATE ISOMERASE                            | 5UPR | A0A125YP67 | 2.00 | Homo 4-mer   | A / B / C / D |
| UBIQUITIN-CONJUGATING ENZYME E2                      | 2AYV | NA         | 2.00 | Monomer      | A             |
| URACIL PHOSPHORIBOSYLTRANSFERASE + URA               | 1BD4 | Q26998     | 2.20 | Monomer      | A             |
| URACIL PHOSPHORIBOSYLTRANSFERASE FROM 1BD4           | 1BD4 | Q26998     | 2.20 | Homo 7-mer   |               |
